# Supplementary material for: Reference values of body composition parameters and visceral adipose tissue (VAT) by DXA in adults aged 18–81 years—results from the LEAD cohort
Source: PubMed Central journal article supplement (PMC7402993; doi:10.1038/s41430-020-0596-5), 2020-03-02

## Appendicular lean mass/height<sup>2</sup> (kg/m<sup>2</sup>) vs. age in adults of different BMI (kg/m<sup>2</sup>) categories

### normal (BMI 18.5-<25 kg/m<sup>2</sup>)

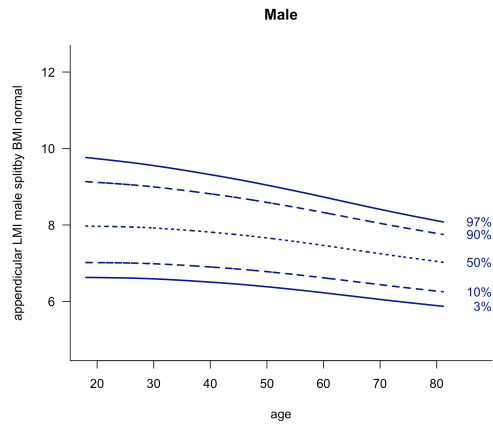

### overweight (BMI 25-<30 kg/m<sup>2</sup>)

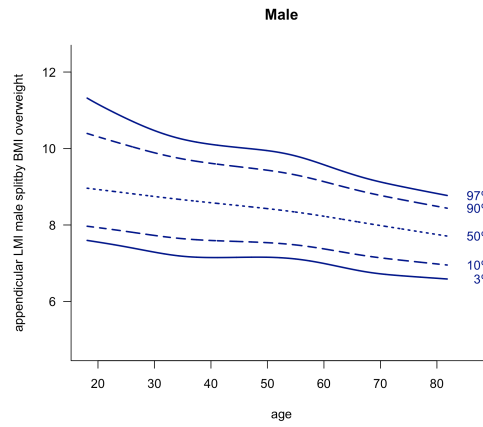

### obesity (BMI ≥30 kg/m<sup>2</sup>)

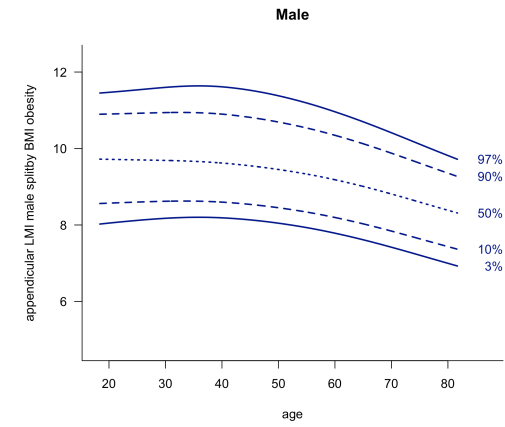

### Female

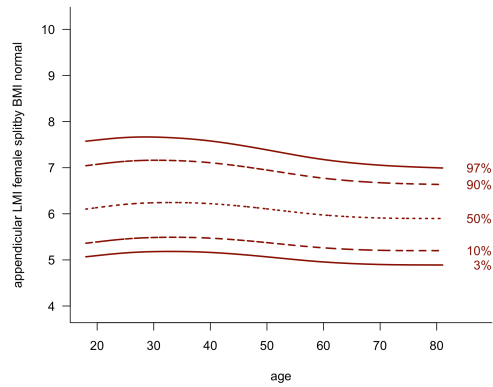

### Female

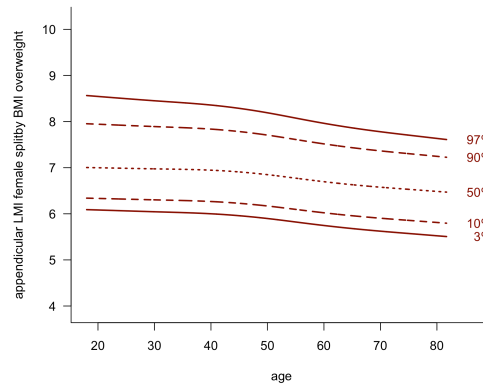

### Female

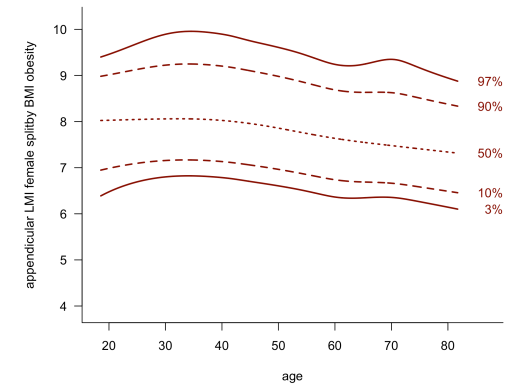

Supplement: 41430_2020_596_MOESM2_ESM.pdf [file 41430_2020_596_MOESM2_ESM.pdf]
