# Supplementary material for: Reference values of body composition parameters and visceral adipose tissue (VAT) by DXA in adults aged 18–81 years—results from the LEAD cohort
Source: PubMed Central journal article supplement (PMC7402993; doi:10.1038/s41430-020-0596-5), 2020-03-02
Supplement: 41430_2020_596_MOESM4_ESM.pdf [file 41430_2020_596_MOESM4_ESM.pdf]

**Tables S1-22:** LMS parameter modeled percentiles (3<sup>rd</sup>, 10<sup>th</sup>, 50<sup>th</sup>, 90<sup>th</sup>, 97<sup>th</sup>) of different body composition parameters (FMI, LMI, appendicular LMI, FM android/gynoid, FM trunk/limb, VAT mass, LMI by FMI categories, LMI and appendicular LMI by BMI categories)

S1: LMS parameter modeled percentiles of fat mass/height<sup>2</sup> (kg/m<sup>2</sup>) vs. age in males.

| <b>FMI males</b><br>(n=5147)<br><b>age (yrs)</b> | <b>L</b> | <b>M</b> | <b>S</b> | <b>3<sup>rd</sup></b> | <b>10<sup>th</sup></b> | <b>50<sup>th</sup></b> | <b>90<sup>th</sup></b> | <b>97<sup>th</sup></b> |
|--------------------------------------------------|----------|----------|----------|-----------------------|------------------------|------------------------|------------------------|------------------------|
| 18                                               | -0,309   | 4,580    | 0,430    | 2,224                 | 2,752                  | 4,580                  | 8,382                  | 11,620                 |
| 20                                               | -0,256   | 4,845    | 0,424    | 2,344                 | 2,912                  | 4,845                  | 8,703                  | 11,833                 |
| 25                                               | -0,128   | 5,498    | 0,410    | 2,636                 | 3,307                  | 5,498                  | 9,470                  | 12,379                 |
| 30                                               | -0,013   | 6,118    | 0,396    | 2,916                 | 3,690                  | 6,118                  | 10,179                 | 12,929                 |
| 35                                               | 0,081    | 6,642    | 0,382    | 3,166                 | 4,028                  | 6,642                  | 10,739                 | 13,360                 |
| 40                                               | 0,153    | 7,106    | 0,369    | 3,409                 | 4,348                  | 7,106                  | 11,223                 | 13,751                 |
| 45                                               | 0,204    | 7,539    | 0,357    | 3,663                 | 4,665                  | 7,539                  | 11,671                 | 14,138                 |
| 50                                               | 0,239    | 7,934    | 0,345    | 3,924                 | 4,975                  | 7,934                  | 12,073                 | 14,494                 |
| 55                                               | 0,261    | 8,274    | 0,333    | 4,177                 | 5,264                  | 8,274                  | 12,398                 | 14,775                 |
| 60                                               | 0,277    | 8,553    | 0,321    | 4,413                 | 5,523                  | 8,553                  | 12,635                 | 14,960                 |
| 65                                               | 0,291    | 8,773    | 0,311    | 4,625                 | 5,747                  | 8,773                  | 12,784                 | 15,045                 |
| 70                                               | 0,310    | 8,932    | 0,300    | 4,805                 | 5,932                  | 8,932                  | 12,843                 | 15,022                 |
| 75                                               | 0,335    | 9,046    | 0,290    | 4,956                 | 6,085                  | 9,046                  | 12,836                 | 14,921                 |
| 80                                               | 0,364    | 9,142    | 0,280    | 5,097                 | 6,225                  | 9,142                  | 12,807                 | 14,797                 |
| 81                                               | 0,370    | 9,161    | 0,278    | 5,125                 | 6,253                  | 9,161                  | 12,801                 | 14,773                 |

S2: LMS parameter modeled percentiles of fat mass/height<sup>2</sup> (kg/m<sup>2</sup>) vs. age in females.

| <b>FMI females</b><br>(n=5747)<br><b>age (yrs)</b> | <b>L</b> | <b>M</b> | <b>S</b> | <b>3<sup>rd</sup></b> | <b>10<sup>th</sup></b> | <b>50<sup>th</sup></b> | <b>90<sup>th</sup></b> | <b>97<sup>th</sup></b> |
|----------------------------------------------------|----------|----------|----------|-----------------------|------------------------|------------------------|------------------------|------------------------|
| 18                                                 | -0,521   | 7,012    | 0,304    | 4,253                 | 4,920                  | 7,012                  | 10,833                 | 13,812                 |
| 20                                                 | -0,491   | 7,082    | 0,311    | 4,235                 | 4,921                  | 7,082                  | 11,036                 | 14,114                 |
| 25                                                 | -0,415   | 7,259    | 0,330    | 4,178                 | 4,916                  | 7,259                  | 11,560                 | 14,885                 |
| 30                                                 | -0,340   | 7,463    | 0,349    | 4,125                 | 4,921                  | 7,463                  | 12,126                 | 15,691                 |
| 35                                                 | -0,264   | 7,741    | 0,364    | 4,123                 | 4,984                  | 7,741                  | 12,743                 | 16,489                 |
| 40                                                 | -0,189   | 8,141    | 0,372    | 4,221                 | 5,158                  | 8,141                  | 13,415                 | 17,239                 |
| 45                                                 | -0,114   | 8,623    | 0,371    | 4,404                 | 5,425                  | 8,623                  | 14,062                 | 17,848                 |
| 50                                                 | -0,038   | 9,176    | 0,365    | 4,662                 | 5,774                  | 9,176                  | 14,706                 | 18,389                 |
| 55                                                 | 0,037    | 9,800    | 0,355    | 4,987                 | 6,196                  | 9,800                  | 15,382                 | 18,943                 |
| 60                                                 | 0,112    | 10,403   | 0,343    | 5,327                 | 6,630                  | 10,403                 | 15,973                 | 19,385                 |
| 65                                                 | 0,188    | 10,913   | 0,330    | 5,643                 | 7,026                  | 10,913                 | 16,391                 | 19,625                 |
| 70                                                 | 0,263    | 11,326   | 0,316    | 5,932                 | 7,379                  | 11,326                 | 16,646                 | 19,681                 |
| 75                                                 | 0,338    | 11,719   | 0,303    | 6,228                 | 7,734                  | 11,719                 | 16,871                 | 19,720                 |
| 80                                                 | 0,414    | 12,127   | 0,289    | 6,546                 | 8,108                  | 12,127                 | 17,122                 | 19,810                 |
| 81                                                 | 0,429    | 12,208   | 0,287    | 6,611                 | 8,185                  | 12,208                 | 17,173                 | 19,831                 |

S3: LMS parameter modeled percentiles of lean mass/height<sup>2</sup> (kg/m<sup>2</sup>) vs. age in males.

| <b>LMI males</b><br>(n=5147)<br><b>age (yrs)</b> | <b>L</b> | <b>M</b> | <b>S</b> | <b>3<sup>rd</sup></b> | <b>10<sup>th</sup></b> | <b>50<sup>th</sup></b> | <b>90<sup>th</sup></b> | <b>97<sup>th</sup></b> |
|--------------------------------------------------|----------|----------|----------|-----------------------|------------------------|------------------------|------------------------|------------------------|
| 18                                               | -0,071   | 16,828   | 0,112    | 13,662                | 14,595                 | 16,828                 | 19,430                 | 20,792                 |
| 20                                               | -0,114   | 16,950   | 0,110    | 13,812                | 14,735                 | 16,950                 | 19,541                 | 20,902                 |
| 25                                               | -0,218   | 17,243   | 0,107    | 14,172                | 15,073                 | 17,243                 | 19,806                 | 21,163                 |
| 30                                               | -0,308   | 17,490   | 0,104    | 14,471                | 15,353                 | 17,490                 | 20,034                 | 21,389                 |
| 35                                               | -0,355   | 17,671   | 0,102    | 14,675                | 15,549                 | 17,671                 | 20,205                 | 21,560                 |
| 40                                               | -0,343   | 17,817   | 0,101    | 14,822                | 15,698                 | 17,817                 | 20,339                 | 21,683                 |
| 45                                               | -0,275   | 17,942   | 0,100    | 14,933                | 15,817                 | 17,942                 | 20,446                 | 21,769                 |
| 50                                               | -0,177   | 18,045   | 0,099    | 15,012                | 15,908                 | 18,045                 | 20,529                 | 21,827                 |
| 55                                               | -0,079   | 18,123   | 0,098    | 15,084                | 15,987                 | 18,123                 | 20,569                 | 21,833                 |
| 60                                               | 0,009    | 18,123   | 0,096    | 15,119                | 16,018                 | 18,123                 | 20,502                 | 21,718                 |
| 65                                               | 0,080    | 18,034   | 0,093    | 15,110                | 15,990                 | 18,034                 | 20,316                 | 21,471                 |
| 70                                               | 0,143    | 17,877   | 0,090    | 15,064                | 15,916                 | 17,877                 | 20,042                 | 21,129                 |
| 75                                               | 0,212    | 17,701   | 0,086    | 15,006                | 15,827                 | 17,701                 | 19,745                 | 20,763                 |
| 80                                               | 0,284    | 17,528   | 0,083    | 14,953                | 15,742                 | 17,528                 | 19,456                 | 20,407                 |
| 81                                               | 0,298    | 17,495   | 0,082    | 14,942                | 15,725                 | 17,495                 | 19,400                 | 20,338                 |

S4: LMS parameter modeled percentiles of lean mass/height<sup>2</sup> (kg/m<sup>2</sup>) vs. age in females.

| <b>LMI females</b><br>(n=5747)<br><b>age (yrs)</b> | <b>L</b> | <b>M</b> | <b>S</b> | <b>3<sup>rd</sup></b> | <b>10<sup>th</sup></b> | <b>50<sup>th</sup></b> | <b>90<sup>th</sup></b> | <b>97<sup>th</sup></b> |
|----------------------------------------------------|----------|----------|----------|-----------------------|------------------------|------------------------|------------------------|------------------------|
| 18                                                 | -0,928   | 13,602   | 0,103    | 11,391                | 12,016                 | 13,602                 | 15,649                 | 16,824                 |
| 20                                                 | -1,004   | 13,698   | 0,103    | 11,482                | 12,105                 | 13,698                 | 15,774                 | 16,977                 |
| 25                                                 | -1,182   | 13,932   | 0,103    | 11,703                | 12,324                 | 13,932                 | 16,080                 | 17,358                 |
| 30                                                 | -1,293   | 14,152   | 0,103    | 11,901                | 12,525                 | 14,152                 | 16,361                 | 17,697                 |
| 35                                                 | -1,333   | 14,358   | 0,103    | 12,076                | 12,707                 | 14,358                 | 16,614                 | 17,987                 |
| 40                                                 | -1,287   | 14,534   | 0,104    | 12,212                | 12,855                 | 14,534                 | 16,817                 | 18,198                 |
| 45                                                 | -1,126   | 14,663   | 0,104    | 12,286                | 12,950                 | 14,663                 | 16,942                 | 18,290                 |
| 50                                                 | -0,945   | 14,752   | 0,104    | 12,322                | 13,007                 | 14,752                 | 17,018                 | 18,327                 |
| 55                                                 | -0,813   | 14,820   | 0,105    | 12,347                | 13,049                 | 14,820                 | 17,080                 | 18,363                 |
| 60                                                 | -0,734   | 14,881   | 0,105    | 12,377                | 13,091                 | 14,881                 | 17,143                 | 18,416                 |
| 65                                                 | -0,725   | 14,942   | 0,105    | 12,420                | 13,139                 | 14,942                 | 17,219                 | 18,499                 |
| 70                                                 | -0,755   | 15,000   | 0,105    | 12,469                | 13,188                 | 15,000                 | 17,298                 | 18,595                 |
| 75                                                 | -0,778   | 15,059   | 0,106    | 12,517                | 13,239                 | 15,059                 | 17,378                 | 18,691                 |
| 80                                                 | -0,780   | 15,123   | 0,106    | 12,564                | 13,291                 | 15,123                 | 17,459                 | 18,783                 |
| 81                                                 | -0,780   | 15,136   | 0,106    | 12,574                | 13,301                 | 15,136                 | 17,475                 | 18,801                 |

S5: LMS parameter modeled percentiles of appendicular lean mass/height<sup>2</sup> (kg/m<sup>2</sup>) vs. age in males.

| <b>appendicular LMI males (n=5147) age (yrs)</b> | <b>L</b> | <b>M</b> | <b>S</b> | <b>3<sup>rd</sup></b> | <b>10<sup>th</sup></b> | <b>50<sup>th</sup></b> | <b>90<sup>th</sup></b> | <b>97<sup>th</sup></b> |
|--------------------------------------------------|----------|----------|----------|-----------------------|------------------------|------------------------|------------------------|------------------------|
| 18                                               | -0,161   | 8,090    | 0,128    | 6,392                 | 6,884                  | 8,090                  | 9,549                  | 10,335                 |
| 20                                               | -0,178   | 8,154    | 0,127    | 6,453                 | 6,945                  | 8,154                  | 9,618                  | 10,408                 |
| 25                                               | -0,215   | 8,291    | 0,125    | 6,587                 | 7,079                  | 8,291                  | 9,765                  | 10,563                 |
| 30                                               | -0,236   | 8,368    | 0,124    | 6,670                 | 7,161                  | 8,368                  | 9,838                  | 10,635                 |
| 35                                               | -0,228   | 8,387    | 0,122    | 6,702                 | 7,189                  | 8,387                  | 9,838                  | 10,623                 |
| 40                                               | -0,186   | 8,397    | 0,121    | 6,721                 | 7,208                  | 8,397                  | 9,825                  | 10,591                 |
| 45                                               | -0,106   | 8,413    | 0,119    | 6,740                 | 7,229                  | 8,413                  | 9,816                  | 10,558                 |
| 50                                               | 0,005    | 8,420    | 0,118    | 6,745                 | 7,239                  | 8,420                  | 9,792                  | 10,508                 |
| 55                                               | 0,130    | 8,402    | 0,116    | 6,729                 | 7,228                  | 8,402                  | 9,740                  | 10,426                 |
| 60                                               | 0,260    | 8,313    | 0,115    | 6,655                 | 7,154                  | 8,313                  | 9,606                  | 10,259                 |
| 65                                               | 0,379    | 8,182    | 0,113    | 6,549                 | 7,045                  | 8,182                  | 9,426                  | 10,046                 |
| 70                                               | 0,482    | 8,034    | 0,112    | 6,433                 | 6,923                  | 8,034                  | 9,231                  | 9,820                  |
| 75                                               | 0,580    | 7,889    | 0,111    | 6,320                 | 6,804                  | 7,889                  | 9,041                  | 9,603                  |
| 80                                               | 0,677    | 7,754    | 0,109    | 6,214                 | 6,693                  | 7,754                  | 8,864                  | 9,400                  |
| 81                                               | 0,696    | 7,729    | 0,109    | 6,195                 | 6,672                  | 7,729                  | 8,831                  | 9,361                  |

S6: LMS parameter modeled percentiles of appendicular lean mass/height<sup>2</sup> (kg/m<sup>2</sup>) vs. age in females.

| <b>appendicular LMI females (n=5747) age (yrs)</b> | <b>L</b> | <b>M</b> | <b>S</b> | <b>3<sup>rd</sup></b> | <b>10<sup>th</sup></b> | <b>50<sup>th</sup></b> | <b>90<sup>th</sup></b> | <b>97<sup>th</sup></b> |
|----------------------------------------------------|----------|----------|----------|-----------------------|------------------------|------------------------|------------------------|------------------------|
| 18                                                 | -1,14    | 6,093    | 0,127    | 4,934                 | 5,249                  | 6,093                  | 7,293                  | 8,049                  |
| 20                                                 | -0,926   | 6,182    | 0,129    | 4,970                 | 5,303                  | 6,182                  | 7,392                  | 8,128                  |
| 25                                                 | -0,342   | 6,364    | 0,133    | 5,008                 | 5,394                  | 6,364                  | 7,584                  | 8,263                  |
| 30                                                 | 0,370    | 6,455    | 0,136    | 4,929                 | 5,388                  | 6,455                  | 7,647                  | 8,249                  |
| 35                                                 | 0,520    | 6,530    | 0,139    | 4,934                 | 5,419                  | 6,530                  | 7,739                  | 8,338                  |
| 40                                                 | -0,170   | 6,591    | 0,139    | 5,103                 | 5,530                  | 6,591                  | 7,897                  | 8,611                  |
| 45                                                 | -0,584   | 6,569    | 0,138    | 5,156                 | 5,550                  | 6,569                  | 7,919                  | 8,709                  |
| 50                                                 | -0,618   | 6,533    | 0,136    | 5,155                 | 5,539                  | 6,533                  | 7,851                  | 8,622                  |
| 55                                                 | -0,434   | 6,52     | 0,135    | 5,122                 | 5,517                  | 6,520                  | 7,807                  | 8,536                  |
| 60                                                 | -0,206   | 6,531    | 0,136    | 5,093                 | 5,505                  | 6,531                  | 7,795                  | 8,487                  |
| 65                                                 | -0,249   | 6,561    | 0,136    | 5,124                 | 5,535                  | 6,561                  | 7,836                  | 8,538                  |
| 70                                                 | -0,541   | 6,550    | 0,135    | 5,161                 | 5,550                  | 6,550                  | 7,857                  | 8,611                  |
| 75                                                 | -0,659   | 6,558    | 0,133    | 5,204                 | 5,581                  | 6,558                  | 7,855                  | 8,615                  |
| 80                                                 | -0,614   | 6,617    | 0,129    | 5,280                 | 5,655                  | 6,617                  | 7,872                  | 8,597                  |
| 81                                                 | -0,602   | 6,629    | 0,128    | 5,297                 | 5,671                  | 6,629                  | 7,877                  | 8,594                  |

S7: LMS parameter modeled percentiles of fat mass ratio android/gynoid (kg) vs. age in males.

| <b>FM<br/>android/gynoid<br/>males<br/>(n=5147)<br/>age (yrs)</b> | <b>L</b> | <b>M</b> | <b>S</b> | <b>3<sup>rd</sup></b> | <b>10<sup>th</sup></b> | <b>50<sup>th</sup></b> | <b>90<sup>th</sup></b> | <b>97<sup>th</sup></b> |
|-------------------------------------------------------------------|----------|----------|----------|-----------------------|------------------------|------------------------|------------------------|------------------------|
| 18                                                                | -0,154   | 0,328    | 0,290    | 0,194                 | 0,228                  | 0,328                  | 0,480                  | 0,579                  |
| 20                                                                | -0,081   | 0,354    | 0,291    | 0,207                 | 0,245                  | 0,354                  | 0,516                  | 0,619                  |
| 25                                                                | 0,101    | 0,416    | 0,294    | 0,236                 | 0,284                  | 0,416                  | 0,603                  | 0,713                  |
| 30                                                                | 0,273    | 0,478    | 0,297    | 0,260                 | 0,319                  | 0,478                  | 0,686                  | 0,804                  |
| 35                                                                | 0,426    | 0,537    | 0,299    | 0,282                 | 0,353                  | 0,537                  | 0,766                  | 0,889                  |
| 40                                                                | 0,550    | 0,596    | 0,295    | 0,308                 | 0,391                  | 0,596                  | 0,841                  | 0,967                  |
| 45                                                                | 0,645    | 0,655    | 0,284    | 0,340                 | 0,432                  | 0,655                  | 0,908                  | 1,037                  |
| 50                                                                | 0,712    | 0,709    | 0,273    | 0,375                 | 0,475                  | 0,709                  | 0,969                  | 1,098                  |
| 55                                                                | 0,752    | 0,757    | 0,262    | 0,409                 | 0,514                  | 0,757                  | 1,021                  | 1,151                  |
| 60                                                                | 0,769    | 0,796    | 0,253    | 0,440                 | 0,548                  | 0,796                  | 1,063                  | 1,194                  |
| 65                                                                | 0,772    | 0,827    | 0,248    | 0,464                 | 0,574                  | 0,827                  | 1,099                  | 1,232                  |
| 70                                                                | 0,773    | 0,851    | 0,246    | 0,479                 | 0,592                  | 0,851                  | 1,128                  | 1,264                  |
| 75                                                                | 0,779    | 0,868    | 0,247    | 0,488                 | 0,604                  | 0,868                  | 1,152                  | 1,291                  |
| 80                                                                | 0,788    | 0,884    | 0,250    | 0,492                 | 0,611                  | 0,884                  | 1,176                  | 1,319                  |
| 81                                                                | 0,790    | 0,887    | 0,250    | 0,492                 | 0,613                  | 0,887                  | 1,181                  | 1,324                  |

S8: LMS parameter modeled percentiles of fat mass ratio android/gynoid (kg) vs. age in females.

| <b>FM<br/>android/gynoid<br/>females<br/>(n=5747)<br/>age (yrs)</b> | <b>L</b> | <b>M</b> | <b>S</b> | <b>3<sup>rd</sup></b> | <b>10<sup>th</sup></b> | <b>50<sup>th</sup></b> | <b>90<sup>th</sup></b> | <b>97<sup>th</sup></b> |
|---------------------------------------------------------------------|----------|----------|----------|-----------------------|------------------------|------------------------|------------------------|------------------------|
| 18                                                                  | -0,033   | 0,279    | 0,279    | 0,166                 | 0,196                  | 0,279                  | 0,400                  | 0,474                  |
| 20                                                                  | -0,015   | 0,285    | 0,287    | 0,166                 | 0,197                  | 0,285                  | 0,411                  | 0,489                  |
| 25                                                                  | 0,030    | 0,296    | 0,306    | 0,166                 | 0,200                  | 0,296                  | 0,437                  | 0,524                  |
| 30                                                                  | 0,076    | 0,308    | 0,324    | 0,165                 | 0,202                  | 0,308                  | 0,464                  | 0,559                  |
| 35                                                                  | 0,121    | 0,325    | 0,340    | 0,167                 | 0,208                  | 0,325                  | 0,497                  | 0,601                  |
| 40                                                                  | 0,166    | 0,347    | 0,350    | 0,173                 | 0,218                  | 0,347                  | 0,535                  | 0,649                  |
| 45                                                                  | 0,211    | 0,375    | 0,352    | 0,184                 | 0,234                  | 0,375                  | 0,578                  | 0,698                  |
| 50                                                                  | 0,256    | 0,412    | 0,348    | 0,201                 | 0,257                  | 0,412                  | 0,629                  | 0,755                  |
| 55                                                                  | 0,302    | 0,458    | 0,339    | 0,226                 | 0,288                  | 0,458                  | 0,689                  | 0,821                  |
| 60                                                                  | 0,347    | 0,501    | 0,326    | 0,252                 | 0,319                  | 0,501                  | 0,740                  | 0,873                  |
| 65                                                                  | 0,392    | 0,530    | 0,311    | 0,273                 | 0,344                  | 0,530                  | 0,768                  | 0,898                  |
| 70                                                                  | 0,437    | 0,542    | 0,295    | 0,287                 | 0,358                  | 0,542                  | 0,769                  | 0,891                  |
| 75                                                                  | 0,482    | 0,547    | 0,279    | 0,299                 | 0,369                  | 0,547                  | 0,762                  | 0,874                  |
| 80                                                                  | 0,528    | 0,555    | 0,265    | 0,311                 | 0,381                  | 0,555                  | 0,758                  | 0,864                  |
| 81                                                                  | 0,537    | 0,556    | 0,262    | 0,314                 | 0,384                  | 0,556                  | 0,758                  | 0,862                  |

S9: LMS parameter modeled percentiles of fat mass ratio trunk/limb (kg) vs. age in males.

| <b>FM trunk/limb males</b><br>(n=5147)<br><b>age (yrs)</b> | <b>L</b> | <b>M</b> | <b>S</b> | <b>3<sup>rd</sup></b> | <b>10<sup>th</sup></b> | <b>50<sup>th</sup></b> | <b>90<sup>th</sup></b> | <b>97<sup>th</sup></b> |
|------------------------------------------------------------|----------|----------|----------|-----------------------|------------------------|------------------------|------------------------|------------------------|
| 18                                                         | 0,351    | 0,829    | 0,246    | 0,501                 | 0,594                  | 0,829                  | 1,118                  | 1,272                  |
| 20                                                         | 0,389    | 0,882    | 0,247    | 0,529                 | 0,630                  | 0,882                  | 1,189                  | 1,352                  |
| 25                                                         | 0,485    | 1,008    | 0,249    | 0,592                 | 0,712                  | 1,008                  | 1,356                  | 1,537                  |
| 30                                                         | 0,581    | 1,123    | 0,251    | 0,646                 | 0,786                  | 1,123                  | 1,508                  | 1,704                  |
| 35                                                         | 0,674    | 1,227    | 0,252    | 0,693                 | 0,852                  | 1,227                  | 1,644                  | 1,852                  |
| 40                                                         | 0,755    | 1,326    | 0,248    | 0,746                 | 0,922                  | 1,326                  | 1,763                  | 1,977                  |
| 45                                                         | 0,819    | 1,415    | 0,239    | 0,808                 | 0,995                  | 1,415                  | 1,859                  | 2,074                  |
| 50                                                         | 0,861    | 1,494    | 0,229    | 0,871                 | 1,065                  | 1,494                  | 1,941                  | 2,156                  |
| 55                                                         | 0,876    | 1,571    | 0,222    | 0,934                 | 1,132                  | 1,571                  | 2,025                  | 2,242                  |
| 60                                                         | 0,868    | 1,642    | 0,217    | 0,991                 | 1,194                  | 1,642                  | 2,106                  | 2,329                  |
| 65                                                         | 0,842    | 1,699    | 0,215    | 1,035                 | 1,241                  | 1,699                  | 2,177                  | 2,406                  |
| 70                                                         | 0,809    | 1,731    | 0,217    | 1,055                 | 1,263                  | 1,731                  | 2,224                  | 2,462                  |
| 75                                                         | 0,775    | 1,741    | 0,223    | 1,048                 | 1,260                  | 1,741                  | 2,255                  | 2,504                  |
| 80                                                         | 0,742    | 1,746    | 0,232    | 1,030                 | 1,248                  | 1,746                  | 2,284                  | 2,548                  |
| 81                                                         | 0,736    | 1,747    | 0,234    | 1,026                 | 1,245                  | 1,747                  | 2,290                  | 2,557                  |

S10: LMS parameter modeled percentiles of fat mass ratio trunk/limb (kg) vs. age in females.

| <b>FM trunk/limb females</b><br>(n=5747)<br><b>age (yrs)</b> | <b>L</b> | <b>M</b> | <b>S</b> | <b>3<sup>rd</sup></b> | <b>10<sup>th</sup></b> | <b>50<sup>th</sup></b> | <b>90<sup>th</sup></b> | <b>97<sup>th</sup></b> |
|--------------------------------------------------------------|----------|----------|----------|-----------------------|------------------------|------------------------|------------------------|------------------------|
| 18                                                           | 0,439    | 0,761    | 0,219    | 0,483                 | 0,564                  | 0,761                  | 0,991                  | 1,111                  |
| 20                                                           | 0,432    | 0,771    | 0,225    | 0,483                 | 0,566                  | 0,771                  | 1,012                  | 1,137                  |
| 25                                                           | 0,413    | 0,791    | 0,242    | 0,477                 | 0,567                  | 0,791                  | 1,060                  | 1,202                  |
| 30                                                           | 0,395    | 0,810    | 0,260    | 0,470                 | 0,566                  | 0,810                  | 1,107                  | 1,266                  |
| 35                                                           | 0,377    | 0,836    | 0,274    | 0,472                 | 0,574                  | 0,836                  | 1,162                  | 1,338                  |
| 40                                                           | 0,358    | 0,873    | 0,279    | 0,488                 | 0,595                  | 0,873                  | 1,222                  | 1,412                  |
| 45                                                           | 0,340    | 0,922    | 0,277    | 0,520                 | 0,632                  | 0,922                  | 1,290                  | 1,491                  |
| 50                                                           | 0,321    | 0,988    | 0,271    | 0,566                 | 0,683                  | 0,988                  | 1,373                  | 1,584                  |
| 55                                                           | 0,303    | 1,064    | 0,267    | 0,618                 | 0,742                  | 1,064                  | 1,473                  | 1,698                  |
| 60                                                           | 0,284    | 1,134    | 0,265    | 0,662                 | 0,793                  | 1,134                  | 1,568                  | 1,808                  |
| 65                                                           | 0,266    | 1,180    | 0,263    | 0,694                 | 0,828                  | 1,180                  | 1,630                  | 1,878                  |
| 70                                                           | 0,248    | 1,197    | 0,258    | 0,713                 | 0,847                  | 1,197                  | 1,645                  | 1,894                  |
| 75                                                           | 0,229    | 1,197    | 0,252    | 0,725                 | 0,856                  | 1,197                  | 1,634                  | 1,876                  |
| 80                                                           | 0,211    | 1,191    | 0,245    | 0,734                 | 0,861                  | 1,191                  | 1,614                  | 1,848                  |
| 81                                                           | 0,207    | 1,190    | 0,243    | 0,735                 | 0,862                  | 1,190                  | 1,610                  | 1,842                  |

S11: LMS parameter modeled percentiles of visceral adipose tissue mass (g) vs. age in males.

| VAT mass<br>males<br>(n=5025)<br>age (yrs) | L     | M        | S     | 3 <sup>rd</sup> | 10 <sup>th</sup> | 50 <sup>th</sup> | 90 <sup>th</sup> | 97 <sup>th</sup> |
|--------------------------------------------|-------|----------|-------|-----------------|------------------|------------------|------------------|------------------|
| 18                                         | 0,352 | 164,402  | 1,163 | 2,522           | 19,875           | 164,402          | 544,54           | 831,752          |
| 20                                         | 0,362 | 215,556  | 1,099 | 4,797           | 30,106           | 215,556          | 672,766          | 1008,762         |
| 25                                         | 0,385 | 348,315  | 0,955 | 16,397          | 66,532           | 348,315          | 949,692          | 1364,701         |
| 30                                         | 0,408 | 504,977  | 0,844 | 39,158          | 121,24           | 504,977          | 1236,749         | 1716,580         |
| 35                                         | 0,431 | 682,589  | 0,773 | 69,347          | 187,509          | 682,589          | 1557,064         | 2109,543         |
| 40                                         | 0,455 | 879,984  | 0,716 | 109,322         | 268,184          | 879,984          | 1895,154         | 2516,858         |
| 45                                         | 0,478 | 1088,381 | 0,661 | 164,735         | 367,266          | 1088,381         | 2216,959         | 2888,344         |
| 50                                         | 0,501 | 1294,367 | 0,614 | 230,27          | 475,575          | 1294,367         | 2513,252         | 3220,267         |
| 55                                         | 0,525 | 1485,814 | 0,580 | 293,922         | 578,783          | 1485,814         | 2784,187         | 3522,000         |
| 60                                         | 0,548 | 1652,621 | 0,542 | 372,245         | 690,048          | 1652,621         | 2976,178         | 3712,972         |
| 65                                         | 0,571 | 1796,054 | 0,502 | 463,077         | 806,022          | 1796,054         | 3105,718         | 3820,557         |
| 70                                         | 0,594 | 1920,537 | 0,468 | 552,969         | 915,254          | 1920,537         | 3207,081         | 3897,333         |
| 75                                         | 0,618 | 2035,508 | 0,453 | 606,551         | 991,216          | 2035,508         | 3344,046         | 4037,753         |
| 80                                         | 0,641 | 2152,572 | 0,454 | 624,503         | 1038,78          | 2152,572         | 3530,371         | 4254,737         |
| 81                                         | 0,646 | 2176,451 | 0,455 | 626,538         | 1047,223         | 2176,451         | 3570,099         | 4301,663         |

S12: LMS parameter modeled percentiles of visceral adipose tissue mass (g) vs. age in females.

| VAT mass<br>females<br>(n=5274)<br>age (yrs) | L     | M        | S     | 3 <sup>rd</sup> | 10 <sup>th</sup> | 50 <sup>th</sup> | 90 <sup>th</sup> | 97 <sup>th</sup> |
|----------------------------------------------|-------|----------|-------|-----------------|------------------|------------------|------------------|------------------|
| 18                                           | 0,242 | 137,633  | 1,090 | 8,081           | 24,993           | 137,633          | 458,575          | 727,408          |
| 20                                           | 0,248 | 146,029  | 1,081 | 8,631           | 26,746           | 146,029          | 480,756          | 758,358          |
| 25                                           | 0,261 | 167,825  | 1,057 | 10,183          | 31,552           | 167,825          | 535,452          | 832,810          |
| 30                                           | 0,274 | 203,256  | 1,032 | 12,722          | 39,302           | 203,256          | 628,655          | 964,506          |
| 35                                           | 0,287 | 255,221  | 1,002 | 16,906          | 51,380           | 255,221          | 761,847          | 1151,824         |
| 40                                           | 0,300 | 322,79   | 0,959 | 24,015          | 69,616           | 322,79           | 919,023          | 1364,766         |
| 45                                           | 0,313 | 407,497  | 0,895 | 37,181          | 98,279           | 407,497          | 1086,076         | 1575,645         |
| 50                                           | 0,327 | 512,956  | 0,821 | 59,856          | 141,362          | 512,956          | 1267,110         | 1790,654         |
| 55                                           | 0,340 | 644,199  | 0,751 | 94,190          | 200,976          | 644,199          | 1480,850         | 2041,105         |
| 60                                           | 0,353 | 778,692  | 0,693 | 135,833         | 268,249          | 778,692          | 1686,238         | 2275,688         |
| 65                                           | 0,366 | 895,594  | 0,647 | 179,037         | 333,536          | 895,594          | 1847,131         | 2449,518         |
| 70                                           | 0,379 | 984,534  | 0,607 | 220,43          | 391,518          | 984,534          | 1947,015         | 2542,807         |
| 75                                           | 0,392 | 1057,257 | 0,577 | 257,291         | 441,623          | 1057,257         | 2023,259         | 2610,289         |
| 80                                           | 0,406 | 1123,21  | 0,553 | 291,383         | 487,490          | 1123,210         | 2093,114         | 2673,336         |
| 81                                           | 0,408 | 1135,92  | 0,548 | 298,161         | 496,502          | 1135,920         | 2106,354         | 2685,180         |

S13: LMS parameter modeled percentiles of lean mass/height<sup>2</sup> (kg/m<sup>2</sup>) vs. age in males with low fat mass/height<sup>2</sup> (kg/m<sup>2</sup>).

| <b>LMI males<br/>with low FMI<br/>(n=1277)<br/>age (yrs)</b> | <b>L</b> | <b>M</b> | <b>S</b> | <b>3<sup>rd</sup></b> | <b>10<sup>th</sup></b> | <b>50<sup>th</sup></b> | <b>90<sup>th</sup></b> | <b>97<sup>th</sup></b> |
|--------------------------------------------------------------|----------|----------|----------|-----------------------|------------------------|------------------------|------------------------|------------------------|
| 18                                                           | 0,576    | 15,893   | 0,117    | 12,572                | 13,594                 | 15,893                 | 18,343                 | 19,539                 |
| 20                                                           | 0,303    | 16,196   | 0,114    | 12,971                | 13,944                 | 16,196                 | 18,688                 | 19,941                 |
| 25                                                           | -0,340   | 16,875   | 0,108    | 13,858                | 14,735                 | 16,875                 | 19,453                 | 20,841                 |
| 30                                                           | -0,930   | 17,183   | 0,103    | 14,384                | 15,175                 | 17,183                 | 19,776                 | 21,265                 |
| 35                                                           | -1,035   | 17,125   | 0,098    | 14,465                | 15,216                 | 17,125                 | 19,595                 | 21,016                 |
| 40                                                           | -0,354   | 17,044   | 0,094    | 14,354                | 15,144                 | 17,044                 | 19,281                 | 20,465                 |
| 45                                                           | 0,269    | 17,079   | 0,091    | 14,331                | 15,169                 | 17,079                 | 19,159                 | 20,192                 |
| 50                                                           | 0,348    | 17,131   | 0,089    | 14,425                | 15,254                 | 17,131                 | 19,152                 | 20,147                 |
| 55                                                           | 0,241    | 17,240   | 0,087    | 14,596                | 15,403                 | 17,240                 | 19,240                 | 20,233                 |
| 60                                                           | 0,886    | 17,258   | 0,085    | 14,527                | 15,391                 | 17,258                 | 19,149                 | 20,040                 |
| 65                                                           | 1,390    | 17,156   | 0,083    | 14,383                | 15,287                 | 17,156                 | 18,948                 | 19,763                 |
| 70                                                           | 1,151    | 16,946   | 0,081    | 14,321                | 15,164                 | 16,946                 | 18,70                  | 19,512                 |
| 75                                                           | 1,161    | 16,843   | 0,080    | 14,283                | 15,106                 | 16,843                 | 18,552                 | 19,342                 |
| 80                                                           | 1,508    | 16,871   | 0,078    | 14,285                | 15,133                 | 16,871                 | 18,522                 | 19,268                 |
| 81                                                           | 1,578    | 16,883   | 0,078    | 14,291                | 15,144                 | 16,883                 | 18,523                 | 19,262                 |

S14: P LMS parameter modeled percentiles of lean mass/height<sup>2</sup> (kg/m<sup>2</sup>) vs. age in males with normal fat mass/height<sup>2</sup> (kg/m<sup>2</sup>).

| <b>LMI males<br/>with normal<br/>FMI<br/>(n=2593)<br/>age (yrs)</b> | <b>L</b> | <b>M</b> | <b>S</b> | <b>3<sup>rd</sup></b> | <b>10<sup>th</sup></b> | <b>50<sup>th</sup></b> | <b>90<sup>th</sup></b> | <b>97<sup>th</sup></b> |
|---------------------------------------------------------------------|----------|----------|----------|-----------------------|------------------------|------------------------|------------------------|------------------------|
| 18                                                                  | -0,430   | 16,846   | 0,101    | 14,045                | 14,860                 | 16,846                 | 19,234                 | 20,519                 |
| 20                                                                  | -0,382   | 16,916   | 0,100    | 14,112                | 14,931                 | 16,916                 | 19,286                 | 20,553                 |
| 25                                                                  | -0,263   | 17,092   | 0,098    | 14,281                | 15,108                 | 17,092                 | 19,416                 | 20,639                 |
| 30                                                                  | -0,143   | 17,266   | 0,096    | 14,452                | 15,287                 | 17,266                 | 19,542                 | 20,723                 |
| 35                                                                  | -0,023   | 17,437   | 0,094    | 14,626                | 15,468                 | 17,437                 | 19,664                 | 20,804                 |
| 40                                                                  | 0,096    | 17,601   | 0,091    | 14,798                | 15,644                 | 17,601                 | 19,777                 | 20,875                 |
| 45                                                                  | 0,216    | 17,745   | 0,089    | 14,956                | 15,804                 | 17,745                 | 19,868                 | 20,927                 |
| 50                                                                  | 0,336    | 17,865   | 0,087    | 15,097                | 15,946                 | 17,865                 | 19,933                 | 20,951                 |
| 55                                                                  | 0,455    | 17,954   | 0,084    | 15,224                | 16,067                 | 17,954                 | 19,955                 | 20,931                 |
| 60                                                                  | 0,575    | 17,984   | 0,081    | 15,318                | 16,148                 | 17,984                 | 19,904                 | 20,829                 |
| 65                                                                  | 0,695    | 17,949   | 0,078    | 15,371                | 16,179                 | 17,949                 | 19,774                 | 20,645                 |
| 70                                                                  | 0,814    | 17,864   | 0,075    | 15,391                | 16,171                 | 17,864                 | 19,587                 | 20,403                 |
| 75                                                                  | 0,934    | 17,752   | 0,071    | 15,391                | 16,141                 | 17,752                 | 19,373                 | 20,134                 |
| 80                                                                  | 1,054    | 17,630   | 0,068    | 15,382                | 16,100                 | 17,630                 | 19,153                 | 19,863                 |
| 81                                                                  | 1,078    | 17,606   | 0,067    | 15,380                | 16,092                 | 17,606                 | 19,109                 | 19,810                 |

S15: LMS parameter modeled percentiles of lean mass/height<sup>2</sup> (kg/m<sup>2</sup>) vs. age in males with high fat mass/height<sup>2</sup> (kg/m<sup>2</sup>).

| <b>LMI males<br/>with high FMI<br/>(n=1277)<br/>age (yrs)</b> | <b>L</b> | <b>M</b> | <b>S</b> | <b>3<sup>rd</sup></b> | <b>10<sup>th</sup></b> | <b>50<sup>th</sup></b> | <b>90<sup>th</sup></b> | <b>97<sup>th</sup></b> |
|---------------------------------------------------------------|----------|----------|----------|-----------------------|------------------------|------------------------|------------------------|------------------------|
| 18                                                            | -0,219   | 17,558   | 0,117    | 14,170                | 15,155                 | 17,558                 | 20,441                 | 21,987                 |
| 20                                                            | -0,223   | 17,702   | 0,111    | 14,430                | 15,385                 | 17,702                 | 20,460                 | 21,929                 |
| 25                                                            | -0,231   | 18,064   | 0,100    | 15,020                | 15,916                 | 18,064                 | 20,580                 | 21,904                 |
| 30                                                            | -0,239   | 18,435   | 0,097    | 15,432                | 16,318                 | 18,435                 | 20,902                 | 22,195                 |
| 35                                                            | -0,247   | 18,787   | 0,099    | 15,664                | 16,583                 | 18,787                 | 21,367                 | 22,725                 |
| 40                                                            | -0,255   | 19,098   | 0,097    | 15,966                | 16,889                 | 19,098                 | 21,682                 | 23,040                 |
| 45                                                            | -0,263   | 19,339   | 0,090    | 16,378                | 17,255                 | 19,339                 | 21,751                 | 23,010                 |
| 50                                                            | -0,271   | 19,480   | 0,086    | 16,633                | 17,479                 | 19,480                 | 21,782                 | 22,977                 |
| 55                                                            | -0,279   | 19,505   | 0,085    | 16,677                | 17,518                 | 19,505                 | 21,790                 | 22,976                 |
| 60                                                            | -0,287   | 19,411   | 0,087    | 16,533                | 17,387                 | 19,411                 | 21,749                 | 22,967                 |
| 65                                                            | -0,295   | 19,218   | 0,090    | 16,299                | 17,162                 | 19,218                 | 21,605                 | 22,853                 |
| 70                                                            | -0,303   | 18,957   | 0,090    | 16,081                | 16,932                 | 18,957                 | 21,310                 | 22,541                 |
| 75                                                            | -0,311   | 18,668   | 0,088    | 15,891                | 16,714                 | 18,668                 | 20,934                 | 22,118                 |
| 80                                                            | -0,319   | 18,379   | 0,085    | 15,736                | 16,520                 | 18,379                 | 20,524                 | 21,640                 |
| 81                                                            | -0,321   | 18,321   | 0,084    | 15,708                | 16,484                 | 18,321                 | 20,440                 | 21,541                 |

S16: LMS parameter modeled percentiles of lean mass/height<sup>2</sup> (kg/m<sup>2</sup>) vs. age in females with low fat mass/height<sup>2</sup> (kg/m<sup>2</sup>).

| <b>LMI females<br/>with low FMI<br/>(n=1452)<br/>age (yrs)</b> | <b>L</b> | <b>M</b> | <b>S</b> | <b>3<sup>rd</sup></b> | <b>10<sup>th</sup></b> | <b>50<sup>th</sup></b> | <b>90<sup>th</sup></b> | <b>97<sup>th</sup></b> |
|----------------------------------------------------------------|----------|----------|----------|-----------------------|------------------------|------------------------|------------------------|------------------------|
| 18                                                             | -0,477   | 13,004   | 0,093    | 11,000                | 11,586                 | 13,004                 | 14,694                 | 15,597                 |
| 20                                                             | -0,413   | 13,116   | 0,092    | 11,096                | 11,689                 | 13,116                 | 14,802                 | 15,696                 |
| 25                                                             | -0,247   | 13,384   | 0,091    | 11,326                | 11,936                 | 13,384                 | 15,058                 | 15,931                 |
| 30                                                             | -0,049   | 13,609   | 0,089    | 11,515                | 12,142                 | 13,609                 | 15,263                 | 16,107                 |
| 35                                                             | 0,169    | 13,804   | 0,088    | 11,674                | 12,321                 | 13,804                 | 15,433                 | 16,247                 |
| 40                                                             | 0,389    | 13,947   | 0,086    | 11,790                | 12,453                 | 13,947                 | 15,546                 | 16,330                 |
| 45                                                             | 0,592    | 13,996   | 0,085    | 11,828                | 12,503                 | 13,996                 | 15,557                 | 16,310                 |
| 50                                                             | 0,715    | 13,974   | 0,084    | 11,821                | 12,496                 | 13,974                 | 15,498                 | 16,226                 |
| 55                                                             | 0,734    | 13,917   | 0,083    | 11,802                | 12,466                 | 13,917                 | 15,410                 | 16,121                 |
| 60                                                             | 0,656    | 13,869   | 0,081    | 11,805                | 12,450                 | 13,869                 | 15,339                 | 16,044                 |
| 65                                                             | 0,489    | 13,863   | 0,080    | 11,857                | 12,478                 | 13,863                 | 15,322                 | 16,030                 |
| 70                                                             | 0,259    | 13,897   | 0,079    | 11,948                | 12,546                 | 13,897                 | 15,354                 | 16,072                 |
| 75                                                             | 0,011    | 13,963   | 0,078    | 12,066                | 12,641                 | 13,963                 | 15,422                 | 16,155                 |
| 80                                                             | -0,233   | 14,044   | 0,076    | 12,194                | 12,749                 | 14,044                 | 15,506                 | 16,254                 |
| 81                                                             | -0,282   | 14,062   | 0,076    | 12,220                | 12,771                 | 14,062                 | 15,524                 | 16,275                 |



S17: LMS parameter modeled percentiles of lean mass/height<sup>2</sup> (kg/m<sup>2</sup>) vs. age in females with normal fat mass/height<sup>2</sup> (kg/m<sup>2</sup>).

| <b>LMI females with normal FMI (n=2860) age (yrs)</b> | <b>L</b> | <b>M</b> | <b>S</b> | <b>3<sup>rd</sup></b> | <b>10<sup>th</sup></b> | <b>50<sup>th</sup></b> | <b>90<sup>th</sup></b> | <b>97<sup>th</sup></b> |
|-------------------------------------------------------|----------|----------|----------|-----------------------|------------------------|------------------------|------------------------|------------------------|
| 18                                                    | -0,631   | 13,398   | 0,086    | 11,493                | 12,050                 | 13,398                 | 15,010                 | 15,876                 |
| 20                                                    | -0,602   | 13,493   | 0,085    | 11,576                | 12,136                 | 13,493                 | 15,110                 | 15,975                 |
| 25                                                    | -0,529   | 13,726   | 0,085    | 11,776                | 12,348                 | 13,726                 | 15,353                 | 16,217                 |
| 30                                                    | -0,456   | 13,938   | 0,084    | 11,958                | 12,542                 | 13,938                 | 15,572                 | 16,433                 |
| 35                                                    | -0,383   | 14,128   | 0,084    | 12,122                | 12,716                 | 14,128                 | 15,767                 | 16,624                 |
| 40                                                    | -0,310   | 14,290   | 0,083    | 12,261                | 12,864                 | 14,290                 | 15,929                 | 16,781                 |
| 45                                                    | -0,237   | 14,414   | 0,083    | 12,369                | 12,979                 | 14,414                 | 16,050                 | 16,894                 |
| 50                                                    | -0,164   | 14,506   | 0,082    | 12,448                | 13,065                 | 14,506                 | 16,136                 | 16,970                 |
| 55                                                    | -0,091   | 14,585   | 0,082    | 12,517                | 13,139                 | 14,585                 | 16,207                 | 17,032                 |
| 60                                                    | -0,018   | 14,677   | 0,081    | 12,597                | 13,225                 | 14,677                 | 16,292                 | 17,108                 |
| 65                                                    | 0,055    | 14,786   | 0,081    | 12,691                | 13,326                 | 14,786                 | 16,397                 | 17,205                 |
| 70                                                    | 0,128    | 14,903   | 0,080    | 12,792                | 13,434                 | 14,903                 | 16,510                 | 17,311                 |
| 75                                                    | 0,201    | 15,021   | 0,080    | 12,895                | 13,544                 | 15,021                 | 16,624                 | 17,419                 |
| 80                                                    | 0,274    | 15,141   | 0,079    | 12,998                | 13,655                 | 15,141                 | 16,741                 | 17,529                 |
| 81                                                    | 0,289    | 15,165   | 0,079    | 13,019                | 13,678                 | 15,165                 | 16,764                 | 17,552                 |

S18: LMS parameter modeled percentiles of lean mass/height<sup>2</sup> (kg/m<sup>2</sup>) vs. age in females with high fat mass/height<sup>2</sup> (kg/m<sup>2</sup>).

| <b>LMI females with high FMI (n=1435) age (yrs)</b> | <b>L</b> | <b>M</b> | <b>S</b> | <b>3<sup>rd</sup></b> | <b>10<sup>th</sup></b> | <b>50<sup>th</sup></b> | <b>90<sup>th</sup></b> | <b>97<sup>th</sup></b> |
|-----------------------------------------------------|----------|----------|----------|-----------------------|------------------------|------------------------|------------------------|------------------------|
| 18                                                  | -1,376   | 14,765   | 0,092    | 12,638                | 13,233                 | 14,765                 | 16,798                 | 18,002                 |
| 20                                                  | -1,348   | 14,880   | 0,095    | 12,680                | 13,294                 | 14,880                 | 16,995                 | 18,253                 |
| 25                                                  | -1,28    | 15,170   | 0,101    | 12,807                | 13,465                 | 15,170                 | 17,464                 | 18,838                 |
| 30                                                  | -1,211   | 15,466   | 0,104    | 12,978                | 13,670                 | 15,466                 | 17,883                 | 19,329                 |
| 35                                                  | -1,143   | 15,767   | 0,106    | 13,171                | 13,894                 | 15,767                 | 18,280                 | 19,778                 |
| 40                                                  | -1,074   | 16,051   | 0,106    | 13,395                | 14,137                 | 16,051                 | 18,593                 | 20,094                 |
| 45                                                  | -1,006   | 16,288   | 0,100    | 13,713                | 14,440                 | 16,288                 | 18,680                 | 20,058                 |
| 50                                                  | -0,937   | 16,468   | 0,0900   | 14,083                | 14,767                 | 16,468                 | 18,594                 | 19,781                 |
| 55                                                  | -0,869   | 16,581   | 0,084    | 14,289                | 14,952                 | 16,581                 | 18,576                 | 19,670                 |
| 60                                                  | -0,800   | 16,625   | 0,085    | 14,293                | 14,969                 | 16,625                 | 18,642                 | 19,743                 |
| 65                                                  | -0,732   | 16,624   | 0,089    | 14,196                | 14,899                 | 16,624                 | 18,727                 | 19,875                 |
| 70                                                  | -0,663   | 16,590   | 0,092    | 14,089                | 14,814                 | 16,590                 | 18,751                 | 19,928                 |
| 75                                                  | -0,594   | 16,528   | 0,091    | 14,035                | 14,760                 | 16,528                 | 18,659                 | 19,810                 |
| 80                                                  | -0,526   | 16,449   | 0,089    | 14,021                | 14,732                 | 16,449                 | 18,492                 | 19,583                 |
| 81                                                  | -0,512   | 16,433   | 0,088    | 14,017                | 14,725                 | 16,433                 | 18,459                 | 19,539                 |

S19: LMS parameter modeled percentiles of lean mass/height<sup>2</sup> (kg/m<sup>2</sup>) for males in different BMI categories.

| males                                                   | age (yrs) | L      | M      | S     | 3 <sup>rd</sup> | 10 <sup>th</sup> | 50 <sup>th</sup> | 90 <sup>th</sup> | 97 <sup>th</sup> |
|---------------------------------------------------------|-----------|--------|--------|-------|-----------------|------------------|------------------|------------------|------------------|
| <b>BMI 18.5-&lt;25</b><br>kg/m <sup>2</sup><br>(n=3099) | 18        | 0,245  | 16,551 | 0,082 | 14,147          | 14,882           | 16,551           | 18,357           | 19,251           |
|                                                         | 20        | 0,267  | 16,568 | 0,081 | 14,178          | 14,91            | 16,568           | 18,358           | 19,241           |
|                                                         | 30        | 0,374  | 16,631 | 0,078 | 14,312          | 15,027           | 16,631           | 18,337           | 19,171           |
|                                                         | 40        | 0,48   | 16,604 | 0,074 | 14,368          | 15,062           | 16,604           | 18,224           | 19,008           |
|                                                         | 50        | 0,587  | 16,505 | 0,071 | 14,36           | 15,03            | 16,505           | 18,036           | 18,772           |
|                                                         | 60        | 0,694  | 16,389 | 0,068 | 14,335          | 14,98            | 16,389           | 17,836           | 18,526           |
|                                                         | 70        | 0,801  | 16,253 | 0,065 | 14,289          | 14,909           | 16,253           | 17,619           | 18,265           |
|                                                         | 80        | 0,907  | 16,133 | 0,062 | 14,255          | 14,851           | 16,133           | 17,425           | 18,032           |
| <b>BMI ≥25 -&lt;30</b><br>kg/m <sup>2</sup><br>(n=2134) | 18        | -1,458 | 18,427 | 0,078 | 16,136          | 16,788           | 18,427           | 20,527           | 21,729           |
|                                                         | 20        | -1,358 | 18,398 | 0,077 | 16,121          | 16,772           | 18,398           | 20,453           | 21,616           |
|                                                         | 30        | -0,854 | 18,257 | 0,072 | 16,05           | 16,697           | 18,257           | 20,111           | 21,103           |
|                                                         | 40        | -0,35  | 18,173 | 0,068 | 16,031          | 16,674           | 18,173           | 19,859           | 20,72            |
|                                                         | 50        | 0,154  | 18,133 | 0,064 | 16,053          | 16,693           | 18,133           | 19,677           | 20,436           |
|                                                         | 60        | 0,658  | 18,026 | 0,06  | 16,019          | 16,649           | 18,026           | 19,439           | 20,112           |
|                                                         | 70        | 1,162  | 17,777 | 0,057 | 15,859          | 16,474           | 17,777           | 19,064           | 19,661           |
|                                                         | 80        | 1,666  | 17,509 | 0,053 | 15,683          | 16,28            | 17,509           | 18,683           | 19,216           |
| <b>BMI ≥30 kg/m<sup>2</sup></b><br>(n=1001)             | 18        | 1,162  | 19,987 | 0,078 | 17,009          | 17,967           | 19,987           | 21,975           | 22,894           |
|                                                         | 20        | 0,881  | 20,009 | 0,078 | 17,108          | 18,026           | 20,009           | 22,016           | 22,962           |
|                                                         | 30        | -0,456 | 20,133 | 0,076 | 17,535          | 18,307           | 20,133           | 22,237           | 23,332           |
|                                                         | 40        | -1,266 | 20,196 | 0,074 | 17,77           | 18,468           | 20,196           | 22,339           | 23,531           |
|                                                         | 50        | -1,598 | 20,076 | 0,072 | 17,76           | 18,42            | 20,076           | 22,183           | 23,384           |
|                                                         | 60        | -1,599 | 19,827 | 0,07  | 17,59           | 18,23            | 19,827           | 21,848           | 22,994           |
|                                                         | 70        | -1,163 | 19,354 | 0,068 | 17,168          | 17,805           | 19,354           | 21,227           | 22,245           |
|                                                         | 80        | -0,5   | 18,735 | 0,067 | 16,591          | 17,232           | 18,735           | 20,442           | 21,322           |

S20: LMS parameter modeled percentiles of lean mass/height<sup>2</sup> (kg/m<sup>2</sup>) for females in different BMI categories.

| females                                                       | age (yrs) | L      | M      | S     | 3 <sup>rd</sup> | 10 <sup>th</sup> | 50 <sup>th</sup> | 90 <sup>th</sup> | 97 <sup>th</sup> |
|---------------------------------------------------------------|-----------|--------|--------|-------|-----------------|------------------|------------------|------------------|------------------|
| <b>BMI 18.5-&lt;25</b><br><b>kg/m<sup>2</sup></b><br>(n=3099) | 18        | -0,376 | 13,489 | 0,075 | 11,759          | 12,275           | 13,489           | 14,873           | 15,588           |
|                                                               | 20        | -0,317 | 13,561 | 0,075 | 11,822          | 12,343           | 13,561           | 14,944           | 15,654           |
|                                                               | 30        | -0,024 | 13,865 | 0,073 | 12,085          | 12,625           | 13,865           | 15,229           | 15,914           |
|                                                               | 40        | 0,269  | 14,051 | 0,072 | 12,246          | 12,801           | 14,051           | 15,388           | 16,044           |
|                                                               | 50        | 0,561  | 14,007 | 0,07  | 12,206          | 12,768           | 14,007           | 15,297           | 15,916           |
|                                                               | 60        | 0,854  | 13,874 | 0,069 | 12,088          | 12,653           | 13,874           | 15,11            | 15,694           |
|                                                               | 70        | 1,147  | 13,825 | 0,068 | 12,045          | 12,616           | 13,825           | 15,019           | 15,572           |
|                                                               | 80        | 1,44   | 13,853 | 0,067 | 12,068          | 12,649           | 13,853           | 15,013           | 15,541           |
| <b>BMI ≥25 -&lt;30</b><br><b>kg/m<sup>2</sup></b><br>(n=1533) | 18        | -2,745 | 15,144 | 0,064 | 13,652          | 14,067           | 15,144           | 16,612           | 17,515           |
|                                                               | 20        | -2,622 | 15,163 | 0,064 | 13,663          | 14,082           | 15,163           | 16,622           | 17,507           |
|                                                               | 30        | -2,004 | 15,282 | 0,063 | 13,736          | 14,177           | 15,282           | 16,694           | 17,505           |
|                                                               | 40        | -1,386 | 15,427 | 0,063 | 13,83           | 14,294           | 15,427           | 16,8             | 17,548           |
|                                                               | 50        | -0,768 | 15,344 | 0,062 | 13,716          | 14,2             | 15,344           | 16,662           | 17,348           |
|                                                               | 60        | -0,15  | 15,113 | 0,062 | 13,468          | 13,969           | 15,113           | 16,367           | 16,994           |
|                                                               | 70        | 0,468  | 15,049 | 0,061 | 13,365          | 13,89            | 15,049           | 16,257           | 16,839           |
|                                                               | 80        | 1,085  | 15,033 | 0,061 | 13,302          | 13,856           | 15,033           | 16,203           | 16,748           |
| <b>BMI ≥30 kg/m<sup>2</sup></b><br>(n=901)                    | 18        | -1,812 | 17,046 | 0,068 | 15,197          | 15,723           | 17,046           | 18,739           | 19,711           |
|                                                               | 20        | -1,809 | 17,083 | 0,07  | 15,17           | 15,712           | 17,083           | 18,854           | 19,879           |
|                                                               | 30        | -1,794 | 17,263 | 0,083 | 15,053          | 15,669           | 17,263           | 19,412           | 20,709           |
|                                                               | 40        | -1,779 | 17,355 | 0,084 | 15,095          | 15,723           | 17,355           | 19,564           | 20,903           |
|                                                               | 50        | -1,764 | 17,219 | 0,075 | 15,19           | 15,763           | 17,219           | 19,12            | 20,231           |
|                                                               | 60        | -1,749 | 16,959 | 0,073 | 14,999          | 15,554           | 16,959           | 18,78            | 19,836           |
|                                                               | 70        | -1,734 | 16,742 | 0,077 | 14,717          | 15,288           | 16,742           | 18,65            | 19,771           |
|                                                               | 80        | -1,72  | 16,525 | 0,075 | 14,555          | 15,112           | 16,525           | 18,369           | 19,444           |

S21: LMS parameter modeled percentiles of appendicular lean mass/height<sup>2</sup> (kg/m<sup>2</sup>) for males in different BMI categories.

| males                                                   | age (yrs) | L      | M     | S     | 3 <sup>rd</sup> | 10 <sup>th</sup> | 50 <sup>th</sup> | 90 <sup>th</sup> | 97 <sup>th</sup> |
|---------------------------------------------------------|-----------|--------|-------|-------|-----------------|------------------|------------------|------------------|------------------|
| <b>BMI 18.5-&lt;25</b><br>kg/m <sup>2</sup><br>(n=3099) | 18        | -0,495 | 7,972 | 0,103 | 6,629           | 7,017            | 7,972            | 9,134            | 9,767            |
|                                                         | 20        | -0,43  | 7,967 | 0,102 | 6,625           | 7,015            | 7,967            | 9,115            | 9,733            |
|                                                         | 30        | -0,106 | 7,921 | 0,099 | 6,591           | 6,986            | 7,921            | 8,996            | 9,553            |
|                                                         | 40        | 0,219  | 7,813 | 0,095 | 6,506           | 6,902            | 7,813            | 8,815            | 9,317            |
|                                                         | 50        | 0,543  | 7,661 | 0,092 | 6,384           | 6,779            | 7,661            | 8,591            | 9,042            |
|                                                         | 60        | 0,868  | 7,465 | 0,089 | 6,227           | 6,618            | 7,465            | 8,325            | 8,731            |
|                                                         | 70        | 1,193  | 7,249 | 0,086 | 6,053           | 6,439            | 7,249            | 8,043            | 8,408            |
|                                                         | 80        | 1,517  | 7,047 | 0,083 | 5,891           | 6,271            | 7,047            | 7,781            | 8,112            |
| <b>BMI ≥25 -&lt;30</b><br>kg/m <sup>2</sup><br>(n=2134) | 18        | -1,765 | 8,963 | 0,102 | 7,599           | 7,969            | 8,963            | 10,398           | 11,326           |
|                                                         | 20        | -1,489 | 8,927 | 0,101 | 7,553           | 7,931            | 8,927            | 10,307           | 11,16            |
|                                                         | 30        | 0,069  | 8,746 | 0,096 | 7,289           | 7,727            | 8,746            | 9,888            | 10,469           |
|                                                         | 40        | 0,636  | 8,582 | 0,092 | 7,148           | 7,595            | 8,582            | 9,612            | 10,109           |
|                                                         | 50        | -0,073 | 8,428 | 0,087 | 7,156           | 7,537            | 8,428            | 9,432            | 9,944            |
|                                                         | 60        | 0,45   | 8,228 | 0,083 | 6,993           | 7,375            | 8,228            | 9,134            | 9,575            |
|                                                         | 70        | 1,676  | 7,985 | 0,079 | 6,723           | 7,141            | 7,985            | 8,773            | 9,125            |
|                                                         | 80        | 1,468  | 7,752 | 0,076 | 6,606           | 6,981            | 7,752            | 8,489            | 8,823            |
| <b>BMI ≥30 kg/m<sup>2</sup></b><br>(n=1001)             | 18        | 0,939  | 9,723 | 0,094 | 8,018           | 8,559            | 9,723            | 10,896           | 11,447           |
|                                                         | 20        | 0,717  | 9,717 | 0,094 | 8,05            | 8,571            | 9,717            | 10,902           | 11,469           |
|                                                         | 30        | -0,329 | 9,688 | 0,093 | 8,175           | 8,621            | 9,688            | 10,94            | 11,599           |
|                                                         | 40        | -0,888 | 9,62  | 0,092 | 8,187           | 8,598            | 9,62             | 10,899           | 11,613           |
|                                                         | 50        | -0,828 | 9,451 | 0,091 | 8,047           | 8,451            | 9,451            | 10,692           | 11,379           |
|                                                         | 60        | -0,403 | 9,183 | 0,091 | 7,785           | 8,196            | 9,183            | 10,345           | 10,961           |
|                                                         | 70        | 0,175  | 8,811 | 0,09  | 7,418           | 7,84             | 8,811            | 9,878            | 10,412           |
|                                                         | 80        | 0,811  | 8,385 | 0,089 | 6,998           | 7,434            | 8,385            | 9,356            | 9,816            |

S22: LMS parameter modeled percentiles of appendicular lean mass/height<sup>2</sup> (kg/m<sup>2</sup>) for females in different BMI categories.

| females                                                 | age (yrs) | L      | M     | S     | 3 <sup>rd</sup> | 10 <sup>th</sup> | 50 <sup>th</sup> | 90 <sup>th</sup> | 97 <sup>th</sup> |
|---------------------------------------------------------|-----------|--------|-------|-------|-----------------|------------------|------------------|------------------|------------------|
| <b>BMI 18.5-&lt;25</b><br>kg/m <sup>2</sup><br>(n=3099) | 18        | -0,755 | 6,102 | 0,106 | 5,067           | 5,361            | 6,102            | 7,043            | 7,575            |
|                                                         | 20        | -0,714 | 6,134 | 0,106 | 5,094           | 5,39             | 6,134            | 7,073            | 7,601            |
|                                                         | 30        | -0,51  | 6,24  | 0,104 | 5,18            | 5,486            | 6,24             | 7,161            | 7,665            |
|                                                         | 40        | -0,305 | 6,22  | 0,102 | 5,162           | 5,472            | 6,22             | 7,108            | 7,58             |
|                                                         | 50        | -0,101 | 6,106 | 0,1   | 5,066           | 5,375            | 6,106            | 6,949            | 7,386            |
|                                                         | 60        | 0,103  | 5,974 | 0,098 | 4,955           | 5,262            | 5,974            | 6,772            | 7,177            |
|                                                         | 70        | 0,308  | 5,91  | 0,097 | 4,901           | 5,208            | 5,91             | 6,674            | 7,054            |
|                                                         | 80        | 0,512  | 5,898 | 0,095 | 4,89            | 5,201            | 5,898            | 6,638            | 6,998            |
| <b>BMI ≥25 -&lt;30</b><br>kg/m <sup>2</sup><br>(n=2134) | 18        | -2,164 | 7,004 | 0,087 | 6,09            | 6,34             | 7,004            | 7,954            | 8,565            |
|                                                         | 20        | -2,097 | 6,999 | 0,087 | 6,083           | 6,333            | 6,999            | 7,943            | 8,545            |
|                                                         | 30        | -1,763 | 6,975 | 0,087 | 6,044           | 6,303            | 6,975            | 7,892            | 8,452            |
|                                                         | 40        | -1,429 | 6,946 | 0,087 | 6,001           | 6,267            | 6,946            | 7,837            | 8,359            |
|                                                         | 50        | -1,095 | 6,849 | 0,086 | 5,898           | 6,169            | 6,849            | 7,707            | 8,191            |
|                                                         | 60        | -0,762 | 6,696 | 0,086 | 5,746           | 6,022            | 6,696            | 7,516            | 7,963            |
|                                                         | 70        | -0,428 | 6,577 | 0,086 | 5,623           | 5,904            | 6,577            | 7,365            | 7,78             |
|                                                         | 80        | -0,094 | 6,486 | 0,086 | 5,523           | 5,812            | 6,486            | 7,246            | 7,635            |
| <b>BMI ≥30 kg/m<sup>2</sup></b><br>(n=1001)             | 18        | 2,086  | 8,022 | 0,098 | 6,352           | 6,932            | 8,022            | 8,971            | 9,379            |
|                                                         | 20        | 1,433  | 8,029 | 0,098 | 6,477           | 6,987            | 8,029            | 9,015            | 9,46             |
|                                                         | 30        | -1,014 | 8,059 | 0,099 | 6,8             | 7,156            | 8,059            | 9,224            | 9,894            |
|                                                         | 40        | -1,182 | 8,025 | 0,099 | 6,785           | 7,133            | 8,025            | 9,204            | 9,896            |
|                                                         | 50        | -0,789 | 7,858 | 0,099 | 6,606           | 6,964            | 7,858            | 8,981            | 9,609            |
|                                                         | 60        | -0,241 | 7,636 | 0,099 | 6,364           | 6,739            | 7,636            | 8,688            | 9,241            |
|                                                         | 70        | -1,648 | 7,479 | 0,099 | 6,356           | 6,663            | 7,479            | 8,628            | 9,35             |
|                                                         | 80        | -0,564 | 7,34  | 0,099 | 6,144           | 6,49             | 7,34             | 8,378            | 8,945            |
